# Supplementary material for: Rock Avalanche-Generated Sediment Mass Flows: Definitions and Hazard
Source: Frontiers journal article supplement (doi:10.3389/feart.2020.543937), 2020-09-30
Supplement: Data_Sheet_1.xlsx [file Data_Sheet_1.xlsx]

## Sheet: Data Summary
Summary of events and attributes
					Zone 1 Attributes1						Zone 2 Attributes
Event Name	Date	Latitude	Longitude	Volume (M m3)	Area (m2)	Fall Height (m)	Runout (m)	Confinement	Substrate	Source Geology	Area (m2)	Fall Height (m)	Runout (m)	Confinement	Substrate	Temporal Uncertainty	Spatial Uncertainty	Reference(s)
McAuley Creek	May/June 2002	50.1181 N	118.9189 W	7.4	462000	500	1600	Frontal	Saturated	Fresh/strong	27520	50	340	Lateral	Saturated	1	1	Brideau et al. 2012
Zymoetz River	8 July 2002	54.4483 N	128.3005 W	1	450000	610	1220	Frontal	Unsaturated	Weak/weathered	196500	610	2820	Lateral	Saturated	0	2	Boultbee et al. 2006
Pink Mountain	July 2002	57.0435 N	122.882 W	1	392000	450	1950	Unconfined	Saturated	Weak/weathered	0	0	0	Unconfined		1	2	Geertsema et al. 2006, Dufrense and Geertsema 2019
Mosque	2001	56.4466 N	127.3304 W	5	232400	520	1260	Unconfined	Saturated	Weak/weathered	45200	7	110	Lateral	Saturated	1	2	Lu et al. 2003
Mount Meager	6 August 2010	50.6209 N	123.4848 W	53	7070000	1720	8950	Lateral	Saturated	Weak/weathered	727000	8	750	Unconfined	Saturated	0	1	Guthrie et al. 2012, Roberti et al. 2018
Harold Price	22-24 June 2002	55.0803 N	126.9569 W	1.6	637000	730	2660	Lateral	Saturated	Weak/weathered	96800	110	2010	Lateral	Saturated	0	2	Geertsema et al. 2006, Dufrense and Geertsema 2019
Sutherland	13 July 2005	54.3801 N	124.9403 W	3	344000	270	1450	Unconfined	Saturated	Weak/weathered	0	0	0	Unconfined		0	2	Blais-Stevens et al. 2015, Dufrense and Geertsema 2019
Little Salmon Lake	22-28 August 2008	62.16 N	134.6486 W	2	331000	490	1620	Unconfined	Saturated	Weak/weathered	70800	67	420	Unconfined		1	2	Brideau et al. 2009
Nomash River	25-26 April 1999	49.9803 N	126.6988 W	0.7	277000	460	1930	Lateral	Saturated	Fresh/strong	15710	14	400	Lateral	Saturated	0	1	Hungr & Evans 2004
Mt Cayley Debris Avalanche 1984	1984	50.1035 N	123.2781 W	0.7	597000	1180	3460	Lateral	Saturated	Weak/weathered	182200	370	3130	Lateral	Saturated	1	2	Evans et al. 2001
Frank Slide	29 April 1903	49.5823 N	114.4129 W	37	3406000	760	3080	Frontal	Saturated	Fresh/strong	570000	2	400	Unconfined	Saturated	0	2	Cruden & Krahn 1973, Cruden & Hungr 1986
Hope Slide	9 January 1965	49.3072 N	121.2334 W	48	2531000	1080	2630	Frontal	Saturated	Fresh/strong	1680000	15	1610	Unconfined	Saturated	0	1	Mathews & McTaggart 1978
Cheam	5000 years BP	49.166 N	121.73 W	180	11664000	1050	6420	Unconfined	Saturated	Weak/weathered	5830000	15	1690	Unconfined	Saturated	2	3	Orwin et al. 2004, BGC 2018
Joffre Peak May 13, 2019	13 May 2019	50.3439 N	122.4458 W	1.9	1266000	1200	4000	Lateral	Saturated	Fresh/strong	17530	37	420	Lateral	Saturated	0	1	Friele et al (2020)
Joffre Peak May 16, 2019	16 May 2019	50.3439 N	122.4458 W	3.1	1147000	1300	3650	Lateral	Saturated	Fresh/strong	177200	130	2190	Lateral	Saturated	0	1	Friele et al (2020)
Eagle Pass	May 1999	50.9716 N	118.3786 W	0.1	129000	570	950	Unconfined	Saturated	Fresh/strong	0	0	0	Unconfined	Saturated	1	2	Hungr & Evans 2004
Xinmo	24 June 2017	32.0663 N	103.6504 E	4.5	1535000	1120	2600	Frontal	Saturated	Fresh/strong	0	0	0	Unconfined	Saturated	0	1	Scaringi et al. 2018
Nayong	28 August 2017	26.6346 N	105.4489 E	0.8	218500	270	640	Unconfined	Saturated		28510	20	170	Unconfined	Saturated	0	1	Zhu et al. 2019; Fan et al. 2019
Bondo	23 August 2017	46.317 N	9.6 E	3.3	1192000	1420	3240	Lateral	Saturated	Fresh/strong	260700	560	3540	Lateral	Saturated	0	1	Walter et al. 2019; Mergili et al. 2019
Santa Lucia	16 December 2017	43.413 S	72.367 W	7.2	2094000	1050	5890	Lateral	Saturated	Weak/weathered	2292000	180	3800	Lateral	Saturated	0	1	Duhart et al. 2019
Flims/Bonaduz	8300 years BP	46.87 N	9.26 E	11000	63694000	1670	13650	Frontal	Saturated	Fresh/strong	22269000	31	14640	Lateral	Saturated	2	3	Calhoun and Clague 2018; Poschinger et al. 2006
Baige Oct 11, 2018	11 October 2018	31.0823 N	98.705 E	24	1278000	780	1890	Frontal	Saturated	Weak/weathered	577000	16	1050	Lateral	Saturated	0	1	Li et al. 2019; Ouyang et al. 2019; Wang et al. 2019; Yang et al. 2019
Baige Nov 3, 2018	3 November 2018	31.0823 N	98.705 E	9.1	768000	790	1950	Frontal	Saturated	Weak/weathered	342700	20	1230	Lateral	Saturated	0	1	Li et al. 2019; Ouyang et al. 2019; Wang et al. 2019; Yang et al. 2019
Gaunling	28 June 2010	25.9861 N	105.2806 E	1.8	170500	380	1260	Lateral	Saturated	Weak/weathered	10210	38	280	Lateral	Saturated	0	1	Yin et al., 2011
West Salt Creek	25 May 2014	39.1661 N	107.8473 W	55	2355000	670	4530	Lateral	Saturated	Weak/weathered	0	0	0	Unconfined		0	1	Coe et al., 2016
Preonzo	15 May 2012	46.2513 N	8.9823 E	0.21	364300	1240	1820	Unconfined	Saturated	Fresh/strong	0	0	0	Unconfined		0	1	Loew et al., 2017
Su Village	28 September 2016	28.7842 N	119.3036 E	0.4	203500	460	1080	Frontal	Saturated	Fresh/strong	0	0	0	Lateral	Saturated	0	1	Ouyang et al., 2018
Round Top	930 CE	42.9224 S	171.1033 E	45	4483000	670	3980	Unconfined	Saturated		1058000	6	420	Unconfined		2	3	Wright 1998; Dufrense et al. 2010
Matakitaki	17 June 1929	41.8401 S	172.3134 E	18	1635000	390	1690	Unconfined	Saturated	Fresh/strong	623000	2	280	Unconfined	Saturated	0	2	Hancox et al 2002
Madison Canyon	18 August 1959	44.82 N	111.427 W	20	1092000	290	1300	Frontal	Unsaturated	Fresh/strong	0	0	0	Unconfined		0	2	Wolter et al. (2016) Hadley (1978)
Val Pola	28 July 1987	46.3764 N	10.3301 E	50	3569000	1020	2940	Frontal	Saturated	Fresh/strong	0	0	0	Confined	Saturated	0	2	Govi et al. 2000
Goldau	2 September 1806	47.0792 N	8.5604 E	38	4888000	1020	4700	Unconfined	Saturated	Fresh/strong	2100000	13	1130	Unconfined	Saturated	0	2	Bussman & Anselmetti 2010; Fitze 2010.
Notes:
1. Complete descriptions of the Zone 1 attributes are provided in: Mitchell, A., McDougall, S., Nolde, N., Brideau, M.-A., Whittall, J. and Aaron, J. (2020) Rock avalanche runout prediction using stochastic analysis of a regional dataset. Landslides 17: 777-792: DOI: 10.1007/s10346-019-01331-3.

## Sheet: References
References:
Blais-Stevens, A., Geertsema, M., Schwab, J., van Asch, T.W.J. (2015) Complex Landlside Triggered in an Eocene Volcanic-Volcaniclastic Succession along Sutherland River, British Columbia, Canada. Environmental and Engineering Geoscience 11(1): 35-45.
Boultbee, N., Stead, D., Schwab, J., Geertsema, M. (2006) The Zymoetz River rock avalanche, June 2002, British Columbia, Canada. Engineering Geology 83(1):76–93.
Brideau, M.-A., Stead, D., Hopkinson, C., Demuth, M., Barlow, J., Evans, S., Delaney, K. (2009) Preliminary description and slope stability analyses of the 2008 Little Salmon Lake and 2007 Mt. Steele landslides, Yukon, The Little Salmon Lake landslide reactivation. Yukon Exploration and Geology 2009: 1–16.
Brideau, M.-A., McDougall, S., Stead, D., Evans, S.G., Turner, K. (2012) Three-dimensional distinct element modelling and dynamic runout analysis of a landslide in gneissic rock, British Columbia, Canada. Bulletin of Engineering Geology and the Environment 71(3): 467–486.
Bussman, F., Anselmetti, F.S., (2010) Rossberg landslide history and flood chronology as recorded in Lake Lauerz sediments (Central Switzerland). Swiss Journal of Geoscience 103: 43-59.
Calhoun, N.C., Clague, J.J. (2018) Distinguishing between debris flows and hyperconcentrated flows: an example from the eastern Swiss Alps. Earth Surface Processes and Landforms 43: 1280-1294.
Coe, J.A., Baum, R.L., Allstadt, K.E., Kochevar, B.F., Schmitt, R.G., Morgan, M.L., White, J.L., Stratton, B,T., Hayashi, T.A., Kean, J.W. (2016) Rock-avalanche dynamics revealed by large-scale field mapping and seismic signals at a highly mobile avalanche in the West Salt Creek valley, western Colorado. Geosphere 12: 607-631.
Cruden, D.M. (1976) Major rock slides in the Rockies. Canadian Geotechnical Journal 13: 8–20.
Cruden, D.M., Hungr, O. (1986) The debris of the Frank Slide and theories of rockslide-avalanche mobility. Canadian Journal of Earth Science 23: 425-432.
Dufresne, A., Davies, T.R., McSaveney, M.J. (2010) Influence of runout-path material on emplacement of the Round Top rock avalanche, New Zealand. Earth Surface Processes and Landforms 35: 190-201.
Dufresne, A., Geertsema, M. (2019) Rock slide-debris avalanches: flow transformation and hummock formation, examples from British Columbia. Landslides. Doi 10.1007/s10346-019-01280-x
Duhart, P., Sepúlveda, V., Garrido, N., Mella, M., Quiroz, D., Fernández, J., Moreno, H., Hermosilla, G. (2019) The Santa Lucía landslide disaster, Chaitén-Chile: origin and effects. Proceedings of the 7th International Conference on Debris-Flow Hazards Mitigation, Golden CO, USA, June 10 - 13, 2019.
Evans, S.G., Hungr, O., Clague, J.J. (2001) Dynamics of the 1984 rock avalanche and associated distal debris flow on Mount Cayley, British Columbia, Canada: implications for landslide hazard assessment on dissected volcanoes. Engineering Geology 61: 29-51.
Fan, X., Xu., Q., Scaringi, G., Zheng, G., Huang, R., Dai, L., Ju, Y. (2019) The "long" runout rock avalanche in Pusa, China, on August 28, 2017: a preliminary report. Landslides 16: 139-154.
Friele, P., Millard, T.H., Mitchell, A., Allstadt, K.E., Menounos, B., Geertsema, M., Clague, J.J. (2020) Observations on the May 2019 Joffre Peak landslides, British Columbia. Landslides: 17, 913-930, DOI: 10.1007/s10346-019-01332-2
Fitze, P. (2010) Runout analysis of rapid, flow-like landslides (M.Sc. Thesis). Department of Civil Engineering, Hochschule für Technik Rapperswil, Rapperswill-Jona, St. Gallen.
Geertsema, M., Clague, J.J., Schwab, J.W., Evans, S.G. (2006) An overview of recent large catastrophic landslides in northern British Columbia, Canada. Engineering Geology 83:120–143.
Govi, M., Gullà, G., Nicoletti, P.G. (2002) Val Pola rock avalanche of July 28, 1987, in Valtellina (Central Italian Alps). Geological Society of America Reviews in Engineering Geology 15: 71-89
Guthrie RH, Friele P, Allstadt K, Roberts N, Evans SG, Delaney KB, Roche D, Clague JJ, Jakob M (2012) The 6 August 2010 Mount Meager rock slide-debris flow, Coast Mountains, British Columbia: characteristics, dynamics, and implications for hazard and risk assessment. Natural Hazards and Earth Systems Sciences 12: 1277-1294.
Hadley, J.B. (1978) Madison Canyon rockslide, Montana, USA. In: Voight, B. (ed) Rockslides and Rock Avalanches, 1. Elsevier Scientific Publishing, Amsterdam, 172-180.
Hancox, G.T., Perrin, N.D., Dellow, G.D. (2002) Recent studies of historical earthquake-induced landsliding, ground damage, and MM intensity in New Zealand. Bulletin of the New Zealand Society for Earthquake Engineering 35: 59-95.
Hungr, O., Evans, S.G. (2004) Entrainment of debris in rock avalanches: An analysis of a long run-out mechanism. Bulletin of the Geological Society of America 116(9–10): 1240–1252.
Li, H., Qi, S., L, H., Cui, Y., Zhou, J. (2019) Mass movemenet and formation process analysis of the two sequential landslide dam events in Jinsha River, Southwest China. Landslides 16: 2247-2258.
Loew, S., Gschwind, S., Gischig, V., Keller-Singer, A., Valenti, G. (2017) Monitoring and early warning of the 2012 Preonzo catastrophic rockslope failure. Landslides 14: 141-154.
Lu, Z., Rollerson, T., Geertsema, M. (2003) The Mosque Montain Rockslide, Sustut Watershed, Fort St. James, Northern British Columbia, Canada, 3rd Canadian Conference on Geotechnique and Natural Hazards, Edmonton, Canada.
Matthews, W.H., McTaggart, K.C. (1978) Hope rockslides, British Columbia, Canada. In Rockslides and Avalanches 1, Natural Phenomena, (ed.) B. Voight; Elsevier Scientific Publishing Company, New York, 259-275.
Mergili, M., Jaboyedoff, M., Pullarello, J., Pudasaini, S.P. (2020) Back-calculation of the 2017 Piz Cengalo-Bondo landslide cascade with r.avaflow. Natural Hazards and Earth System Sciences 20: 505-520.
Orwin, J.F., Clague, J.J., Gerath, R.F. (2004) The Cheam rock avalanche, Fraser Valley, British Columbia, Canada. Landslides 1: 289-298.
Ouyang, C., An, H., Zhou, S., Wang, Z., Su, P., Wang, D. Cheng, D., She, J. (2019) Insights from the failure and dynamic characteristics of two sequential landslides at Baige village along the Jonsha River, China. Landslides 16: 1397-1414.
Ouyang, C., Zhao, W., Xu, Q., Peng, D., Li, W., Wang, D., Zhou, S., Hou, S. (2018) Failure mechanisms and characteristics of the 2016 catastrophic rockslide at Su village, Lishui, China. Landslides 15: 1391-1400.
Roberti, G., Ward, B., van Wyk de Vries, B., Friele, P., Perotti, L., Clague, J.J., Giardino, M. (2018) Precursory slope distress prior to the 2010 Mount Meager landslide, British Columbia
Poschinger, A., Wassmer, P., Maisch, M. (2006) The Flims rockslide: History of interpretation and new insights. In Evans, S.G., Hugnozza, G.S., Strom A., Hermanns, R.L. (eds) Landslides from Massive Rock Slope Failure. Springer, Dorderecht.
Scaringi, G., Fan, X., Xu, Q., Liu C., Ouyang, C., Domènech, G., Yang, F., Dai, L. (2018) Some considerations on the use of numerical methods to simulate past landslides and possible new failures: the case of the recent Xinmo landslide (Sichuan, China). Landslides 15: 1359-1375.
Walter, F., Amann, F., Kos, A., Kenner, R., Phillips, M., de Preux, A. Huss, M., Tognacca, C., Clinton, J., Diehl, T., Bonanomi, Y. (2019) Direct observations of a three million cubic meter rock-slope collapse with almost immediate initiation of ensuing debris flows. Geomorphology 351: 106933, 1-11.
Wang, W., Yin, Y., Zhu, S., Wang,L., Zhang, N., Zhao, R. (2019) Investigation and numerical modeling of the overloading-induced catastraphic rockslide avalanche in Baige, Tibet, China. Bulletin of Engineering Geology and the Environment: DOI 10.1007/s10064-019-01664-2.
Wolter, A., Gischig, V., Stead, D., Clague, J.J. (2016) Investigation of geomorphic and seismic effects on the 1959 Madison Canyon, Montana, landslide using an integrated field, engineering geomorphology mapping, and numerical modelling approach. Rock Mechanics and Rock Engineering 49: 2479-2501.
Wright, C.A. (1998) The AD 930 long-runout Round Top debris avalanche, Westland, New Zealand. New Zealand Journal of Geology and Geophysics 41: 493-497.
Yang, W., Wang, Y., Wang, Y., Ma, C., Ma, Y. Retrospective deformation on the Baige landslide using optical remote sensing images. Landslides: DOI 10.1007/s10346-019-01311-7.
Yin, Y., Sun, P., Zhu, J., Yang, S. (2011) Research on catastrophic rock avalanche at Gaunling, Guizhou, China. Landslides 8: 517-525.
Zhu, Y., Xu, S., Zhuang, Y., Dai, X., Lv, G., Xing, A. (2019) Characteristics and runout behaviour of the disastrous 28 August 2017 rock avalanche in Nayong, Guizhou, China. Engineering Geology 259:105154, 1-11.
